# Supplementary material
Source: publisher figshare collection journal article supplement (https://sage.figshare.com/ndownloader/files/16861610)
Supplement: Supplementary file 1 [file 16861610]

**Supplemental Table 1. Indications for admission**

| <b>Primary Diagnosis</b>                             | <b>HIT</b> | <b>Non-HIT</b> |
|------------------------------------------------------|------------|----------------|
| <b>Graft/device complication</b>                     | 24.47%     | 24.47%         |
| <b>Blockage of device due to thrombosis</b>          | 10.85%     | 9.79%          |
| <b>Aortic aneurysm</b>                               | 7.87%      | 6.38%          |
| <b>Atherosclerosis of lower extremities arteries</b> | 5.32%      | 3.40%          |
| <b>Septicemia</b>                                    | 3.62%      | 4.04%          |
| <b>Embolization and thrombosis</b>                   | 2.77%      | 3.40%          |
| <b>Acute respiratory failure</b>                     | 1.49%      | 1.28%          |
| <b>Peripheral vascular disease</b>                   | 1.28%      | 1.28%          |
| <b>Coronary artery disease</b>                       | 1.28%      | 1.28%          |
| <b>Subendocardial infarction</b>                     | 1.28%      | 1.28%          |
